# Supplementary material for: Exploration of Natural Product Repository by Combined Genomics and Metabolomics Profiling of Mangrove-Derived Streptomyces murinus THV12 Strain
Source: MDPI journal article supplement (doi:10.3390/fermentation9060576), 2023-06-18
Supplement: s1 [file s1]

## Supplementary Materials

### List of Supplementary figures

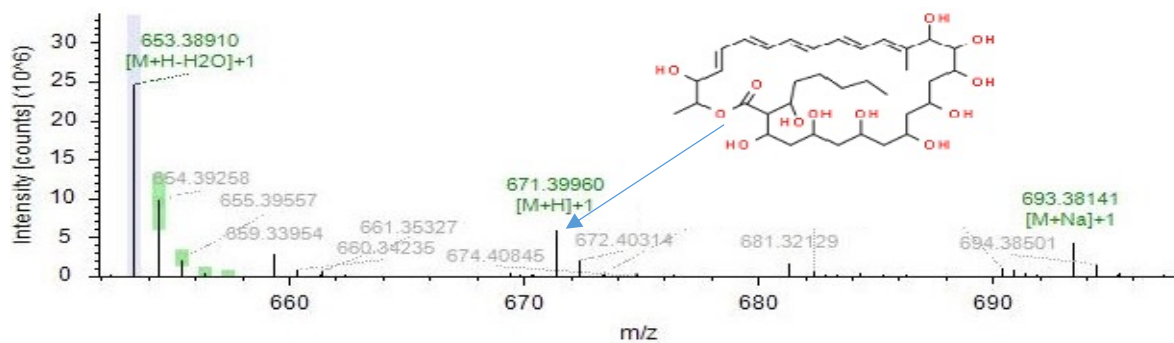

(A)

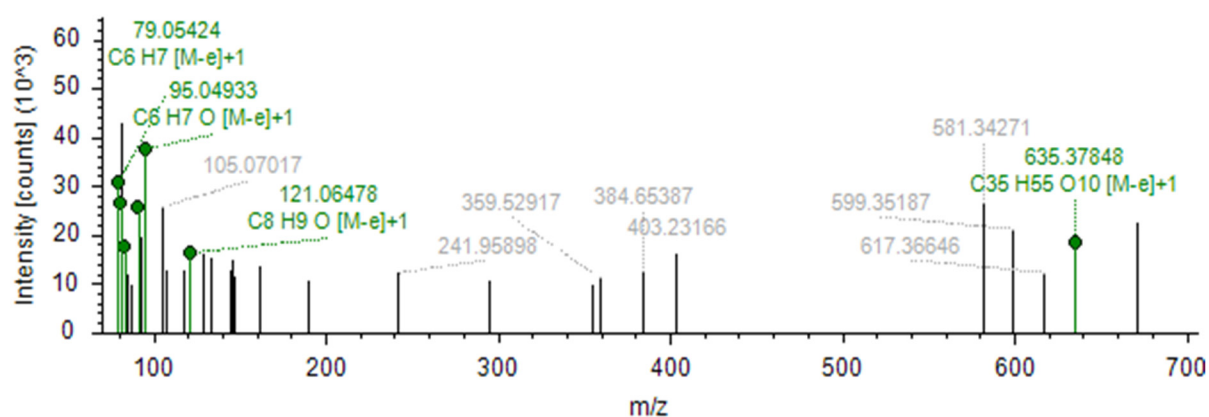

(B)

**Figure S1:** High resolution LC-MS/MS spectrum of fermentation broth extracts of *S. murinus* THV12 corresponding to pentamycin (A) shows MS1 spectrum of pentamycin  $[M+H]^+1$  at  $m/z$  671.39 with RT= 12.33 min (B) shows MS2 spectrum of pentamycin with in-source fragments at  $m/z$  79.05, 95.04, 121.06, 635.37

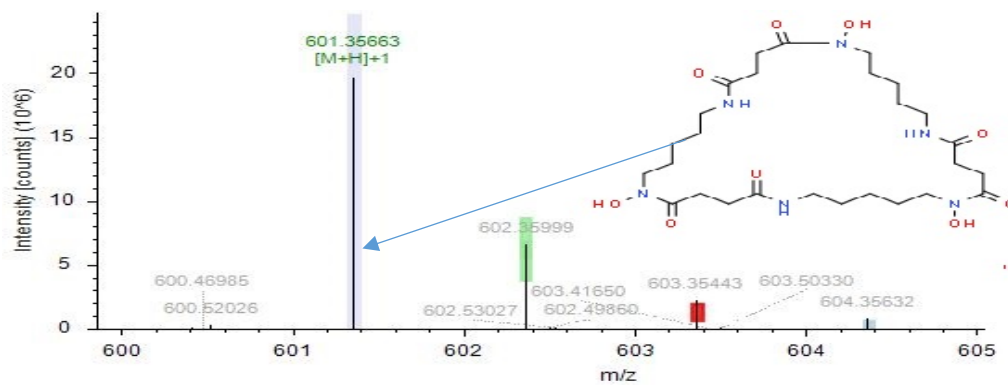

(A)

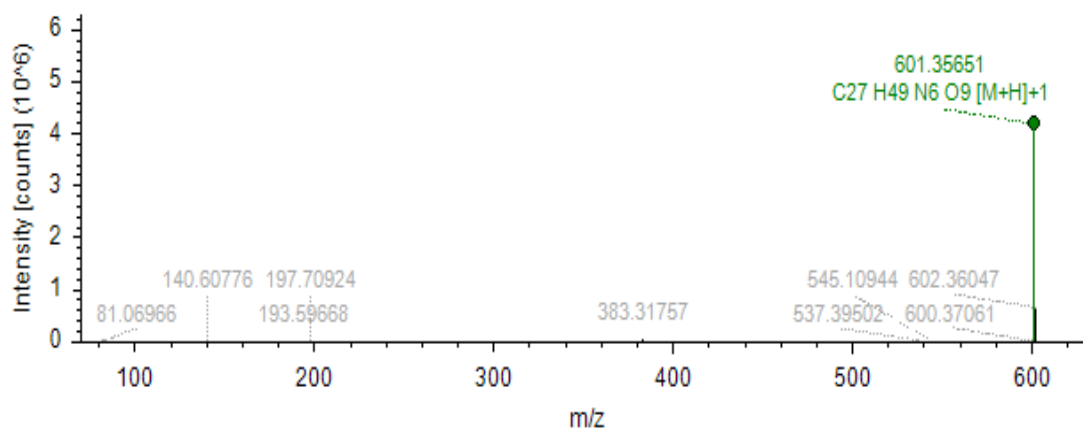

(B)

**Figure S2:** High resolution LC-MS/MS spectrum of fermentation broth extracts of *S. murinus* THV12 corresponding to desferrioxamine E (A) shows MS1 spectrum of desferrioxamine E  $[M+H]^+$  at  $m/z$  601.35 with RT= 20.79 min (B) shows MS2 spectrum of desferrioxamine E with in-source fragments at  $m/z$  601.35

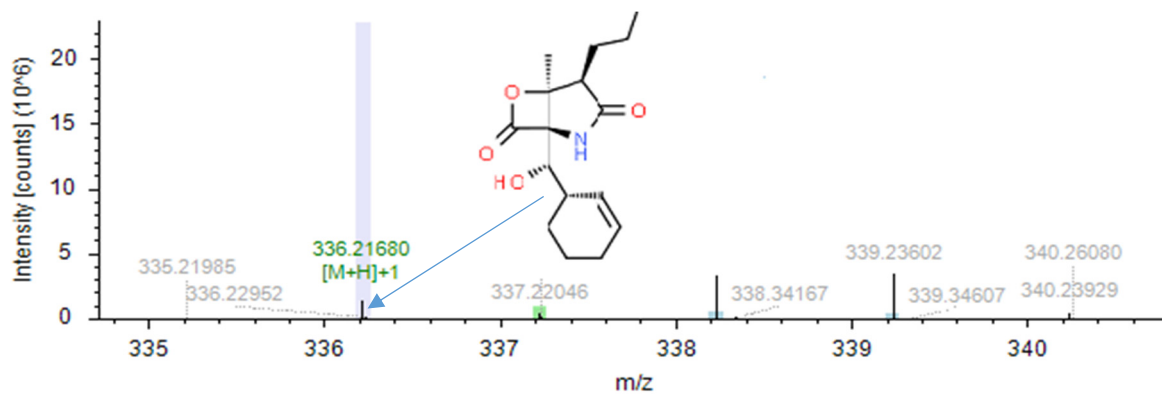

**Figure S3:** High resolution LC-MS/MS spectrum of fermentation broth extracts of *S. murinus* THV12 corresponding to cinnabaramide A, depicts MS1 spectrum of cinnabaramide A  $[M+H]^+$  at  $m/z$  336.21 with RT= 15.52 min

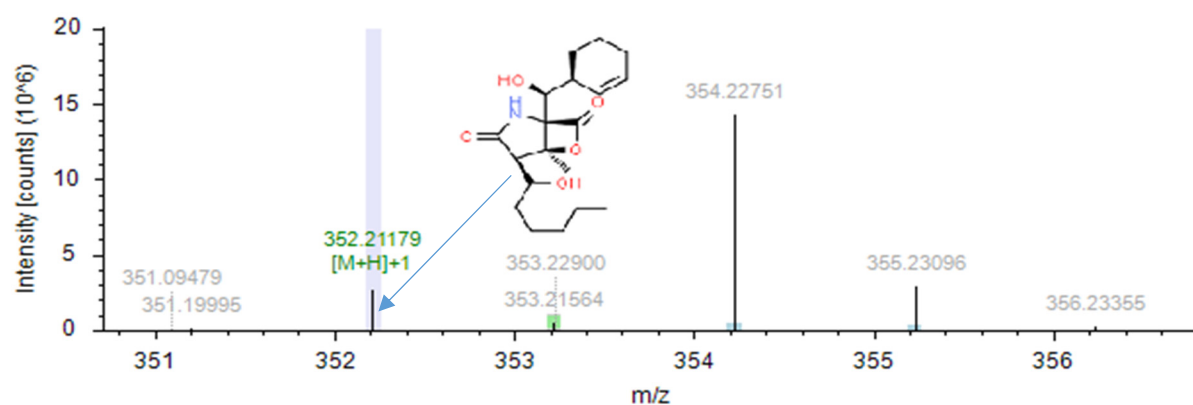

**Figure S4:** High resolution LC-MS/MS spectrum of fermentation broth extracts of *S. murinus* THV12 corresponding to cinnabaramide B, depicts MS1 spectrum of cinnabaramide B  $[M+H]^+$  at  $m/z$  352.21 with RT= 13.70 min

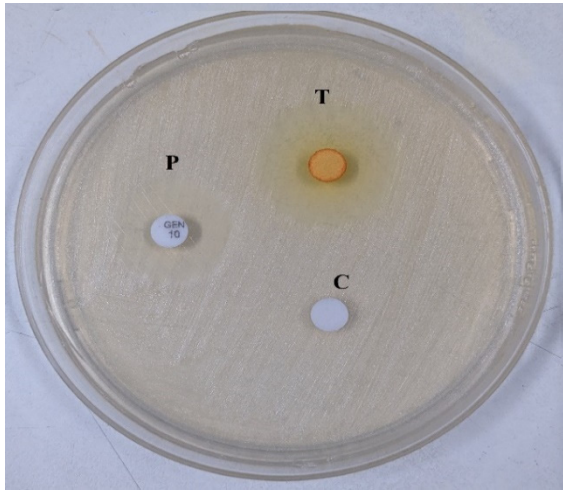

*Methicillin-resistant Staphylococcus aureus*

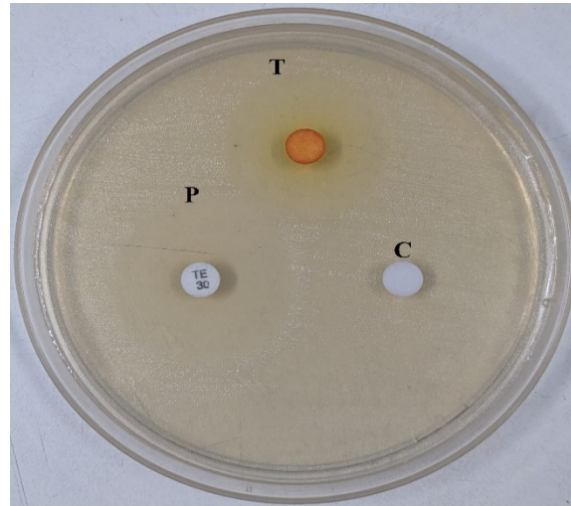

*Enterococcus faecalis*

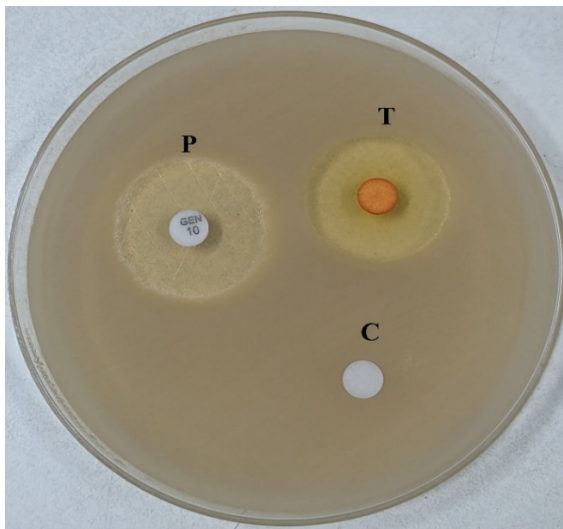

*Bacillus cereus*

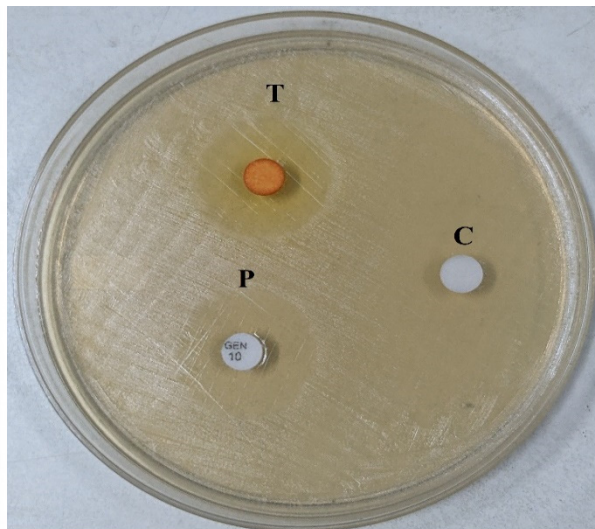

*Listeria monocytogenes*

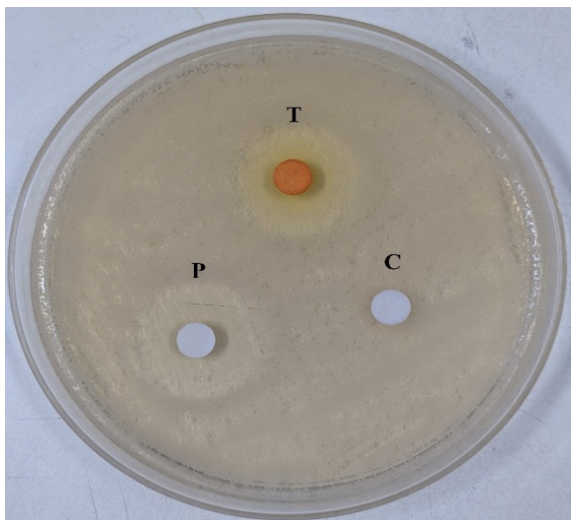

*Candida albicans*

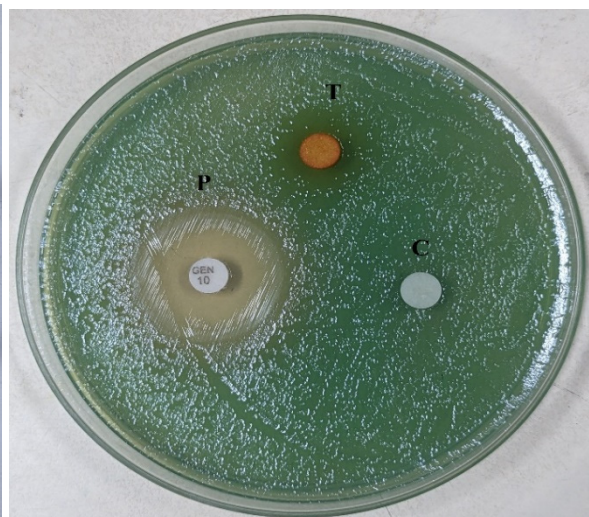

*Pseudomonas aeruginosa*

**Figure S5:** Antagonistic activity exhibited by *S. murinus* THV12 strain (P denotes positive control which are standard antibiotics, T denotes *S. murinus* culture extract and C denotes the control solvent DMSO)

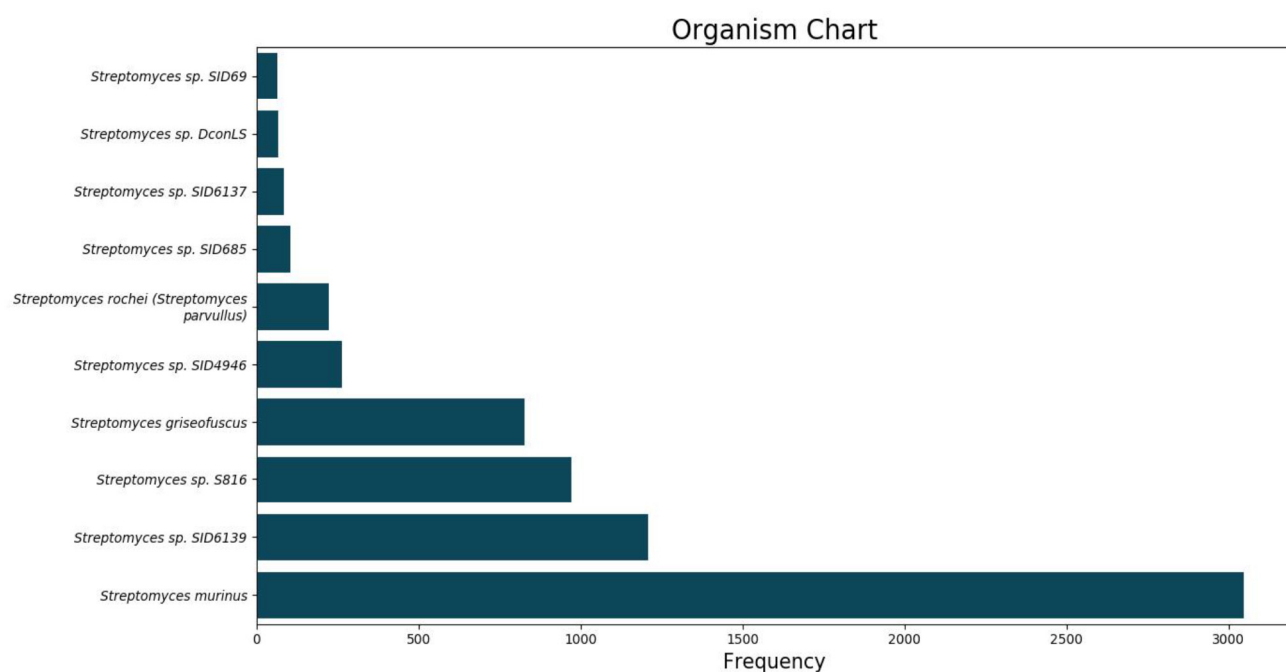

**Figure S6:** BLASTX top 10 hits generated for the functional annotation of the genes from *S. murinus* THV12

| Putative Identity                                 | Molecular Formula | Adduct type                           | RT [min] | ss error (ppm) | Calc. MW  | m/z      | FISh Coverage | Matched Fragment ions                                           | Highest expression in |
|---------------------------------------------------|-------------------|---------------------------------------|----------|----------------|-----------|----------|---------------|-----------------------------------------------------------------|-----------------------|
| Cyclo(L-Pro-L-Val)                                | C10 H16 N2 O2     | [M+H] <sup>+</sup> 1                  | 6.405    | -0.73          | 196.12103 | 197.1283 | 67.24         | 70.06506,98.05983,169.13341,197.12830                           | PDB                   |
| Albuquinone A                                     | C11 H10 N2 O3     | [M+H] <sup>+</sup> 1                  | 7.354    | -0.17          | 218.0691  | 219.0764 | 32.14         | 159.09183,173.07088,220.07993                                   | PDB                   |
| Spoxazomicin D                                    | C10 H10 N2 O3     | [M+H] <sup>+</sup> 1                  | 9.02     | -0.21          | 206.0691  | 207.0764 | 40.79         | 88.03902,120.04400,179.08092,207.07599                          | CcBs                  |
| Actinomycin D4                                    | C60 H84 N12 O16   | [M+2H] <sup>+</sup> 2                 | 16.978   | 0.68           | 1228.6137 | 615.3141 | 21.35         | 86.09645,197.12935,300.19183,628.32050,957.4374<br>4,1297.09998 | SCB                   |
| Actinomycin X08                                   | C62 H86 N12 O17   | [M+2H] <sup>+</sup> 2                 | 14.952   | 0.49           | 1270.624  | 636.3193 | 18.75         | 72.04465,86.09645,300.19183,628.32050,956.45129                 | SCB, PDB              |
| Alkyldihydropyrone B                              | C11 H18 O3        | [M+H-H <sub>2</sub> O] <sup>+</sup> 1 | 8.91     | 0.07           | 198.12561 | 181.1223 | 45.1          | 121.10099,123.08031,139.11147,163.11174,<br>181.12215           | All                   |
| Anthramycin                                       | C16 H17 N3 O4     | [M+H] <sup>+</sup> 1                  | 8.085    | -0.43          | 315.12177 | 316.1291 | 28.57         | 282.12433 ,316.12912                                            | ISP2, GSB             |
| Cyclo-(Leu-Ile)                                   | C12 H22 N2 O2     | [M+H] <sup>+</sup> 1                  | 9.882    | -0.56          | 226.168   | 227.1753 | 45.35         | 86.09638, 199.18066, 227.17557                                  | PDB,R5M               |
| Daryamide E                                       | C17 H24 N2 O5     | [M+2H] <sup>+</sup> 2                 | 7.995    | -0.11          | 336.16849 | 169.0915 | 18.42         | 98.05998, 169.09157                                             | CcBs                  |
| Deacetyldemethylanisomycin                        | C11 H15 N O3      | [M+H] <sup>+</sup> 1                  | 6.949    | -0.32          | 209.10513 | 210.1124 | 67.16         | 91.05405, 119.04897, 151.07521, 210.11232                       | PDB                   |
| Delaminomycin A                                   | C29 H43 N O6      | [M+H] <sup>+</sup> 1                  | 17.517   | 0.09           | 501.30908 | 502.3164 | 54.12         | 133.10107, 149.09607, 485.28891                                 | OMB                   |
| Amorphane sesquiterpenes                          | C15 H26 O4        | [M+H] <sup>+</sup> 1                  | 10.139   | 0.24           | 270.18317 | 271.1905 | 64.71         | 81.06989, 235.17006, 253.17921                                  | R5M                   |
| Enduspeptide A                                    | C47 H74 N10 O13   | [M+2H] <sup>+</sup> 2                 | 19.044   | 0.13           | 986.54381 | 494.2792 |               | Nil                                                             | PDB,OMB               |
| Mullinamide A                                     | C23 H37 N5 O7     | [M+H] <sup>+</sup> 1                  | 8.438    | -0.23          | 495.26918 | 496.2765 | 56.68         | 100.03918, 296.16061, 478.2657, 496.27655                       | All                   |
| N-(4-hydroxyphenethyl)-2-(1H-indol-3-yl)acetamide | C18 H18 N2 O2     | [M+H] <sup>+</sup> 1                  | 10.627   | -0.22          | 294.13676 | 295.144  | 47.37         | 120.08061, 295.14410                                            | All                   |
| Nalidixic acid                                    | C12 H12 N2 O3     | [M+H] <sup>+</sup> 1                  | 7.603    | -0.1           | 232.08477 | 233.0921 | 45.45         | 187.08656, 215.08174, 233.09219                                 | PDB                   |
| Trichostatin                                      | C16 H20 N2 O3     | [M+H] <sup>+</sup> 1                  | 8.519    | 0.09           | 288.14742 | 289.1547 | 45.95         | 146.09663, 164.10690, 174.09151,<br>271.14417,289.15491         | PDB                   |
| Oxopropaline G                                    | C15 H14 N2 O2     | [M+H] <sup>+</sup> 1                  | 8.978    | 0.12           | 254.10556 | 255.1128 | 44            | 237.10242, 255.11276                                            | CcBs                  |
| 2,5-diisopropyl -3-methoxy pyrazine               | C11 H18 N2 O      | [M+H] <sup>+</sup> 1                  | 10.697   | -0.03          | 194.14191 | 195.1492 | 45.83         | 111.05515, 195.14919                                            | CzD, R5M              |
| Pyrrolam B                                        | C8 H13 N O2       | [M+H+MeOH] <sup>+</sup> 1             | 8.847    | -0.22          | 155.09459 | 188.1281 | 18.64         | 128.10686, 156.10199, 188.12888                                 | ISP2, PDB             |

|                   |               |                      |        |       |           |          |       |                                            |     |
|-------------------|---------------|----------------------|--------|-------|-----------|----------|-------|--------------------------------------------|-----|
| Salinosporamide K | C13 H17 N O4  | [M+H] <sup>+</sup> 1 | 10.266 | -0.13 | 251.11572 | 252.123  | 65.52 | 193.08601, 208.13356, 210.11386, 252.12227 | PDB |
| Streptcytosine A  | C30 H42 N6 O9 | [M+H] <sup>+</sup> 1 | 12.303 | -0.01 | 630.30132 | 631.3088 | 20.26 | 70.06512, 126.09090, 233.09225             | All |

Table S1: Putative compounds identified by LC-HR-MS/MS
